# Supplementary material
Source: publisher figshare collection journal article supplement (https://acs.figshare.com/ndownloader/files/9209884)
Supplement: Supplementary file 1 [file 9209884]

Archive with 3 entries (3 files):
- info.xml
- cb7b00389_high_quality.mp4
- cb7b00389.pdf
