# Supplementary material
Source: publisher figshare collection journal article supplement (https://acs.figshare.com/ndownloader/files/9209884)
Supplement: Supplementary file 1 [file 9209884 › info.xml]

<presentation>
	<article>
		<title>Structure Activity Relationships Reveal Key Features of 8-Oxoguanine:A Mismatch Detection by the MutY Glycosylase</title>
		<doi>10.1021/acschembio.7b00389</doi>
		<copyright>American Chemical Society</copyright>
		<narrator>Chandrima Majumdar</narrator>
		<contact>Sheila David, Chandrima Majumdar</contact>
		<contact-email>ssdavid@ucdavis.edu, cmajumdar@ucdavis.edu</contact-email>
		<author-list>
			<author>Sheila S. David</author>
		</author-list>
	</article>
	<slides height-width-ratio=".75">
		<slide audio-time="25">
			<subtitle/>
		</slide>
		<slide audio-time="75">
			<subtitle/>
		</slide>
		<slide audio-time="80">
			<subtitle/>
		</slide>
		<slide audio-time="56">
			<subtitle/>
		</slide>
		<slide audio-time="91">
			<subtitle/>
		</slide>
		<slide audio-time="72">
			<subtitle/>
		</slide>
		<slide audio-time="95">
			<subtitle/>
		</slide>
		<slide audio-time="69">
			<subtitle/>
		</slide>
	</slides>
	<audio duration="563"/>
</presentation>
